# Supplementary material for: The Immunomodulatory Effects of Fluorescein-Mediated Sonodynamic Treatment Lead to Systemic and Intratumoral Depletion of Myeloid-Derived Suppressor Cells in a Preclinical Malignant Glioma Model
Source: MDPI journal article supplement (doi:10.3390/cancers16040792), 2024-02-15

## Supplementary materials

Here we report the set-up of our experiment. The animal was anesthetized using tribromoethanol and positioned prone on a soft pad. The transducer was positioned close to the mouse's skull, at the level of the tumor injection point. A US aqueous coupling medium was used to reduce to minimum air interference.

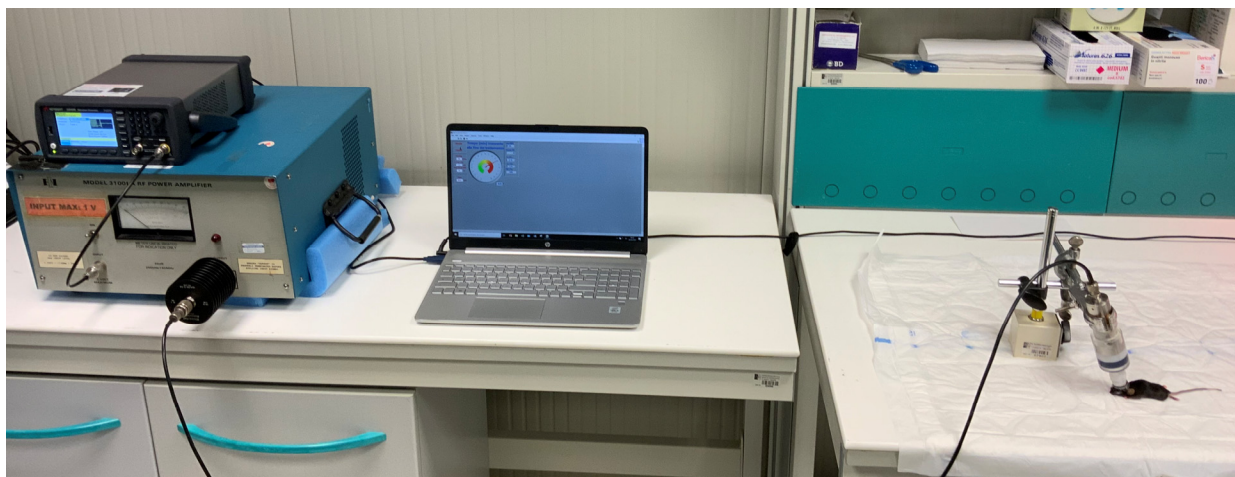

Supplement: s1 [file s1]
